# Supplementary material for: Revisiting the Parallel Strategy for DOACROSS Loops
Source: Springer Nature journal article supplement (doi:10.1007/s11390-019-1919-7), 2019-03-01

Highlights

Journal of Computer Science and Technology

# Revisiting the Parallel Strategy for DOACROSS Loops

**Song Liu, Yuan-Zhen Cui, Nian-Jun Zou, Wen-Hao Zhu,  
Dong Zhang, and Wei-Guo Wu**

Liu S, Cui YZ, Zou NJ et al. Revisiting the parallel strategy for DOACROSS loops. JOURNAL OF COMPUTER SCIENCE AND TECHNOLOGY 34(2): 456–475 Mar. 2019. DOI 10.1007/s11390-019-1919-7

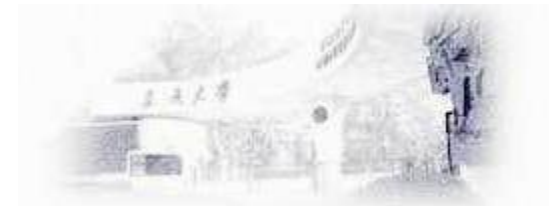

# Research Problem

- **DOACROSS loops** are **hot spots** in many scientific and engineering applications.  
Due to complicated loop-carried dependences, only **pipeline/wave-front parallelism** can be achieved through loop transformations.
- Existing parallel strategies for DOACROSS loops are generally **static**, which means each thread could only execute fixed allocated tasks of loop iterations.  
These static parallel strategies suffer **threads waiting** at **synchronous communication** among parallel threads and cause **waste of computing resources**.

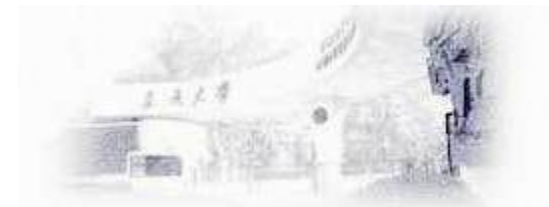

# Kernel Contribution

- We propose a brand-new **dynamic parallel strategy** for DOACROSS loops, which can effectively **avoid idle state of threads** and **optimize synchronization** in pipeline/wave-front parallelism.
- We define a dependence preservation constraint to **reduce redundant dependences and communication** based on **loop tiling** technology.
- We propose a simple and effective **tile size selection (TSS) approach** to make use of hierarchical caches for better data reuse.



# Results

- The proposed parallel strategy shows **good and stable speedups and scalability** over different kinds of benchmarks on a multi-core platform.
- Our parallel strategy **outperforms** 2 typical static parallel strategies and shows **better performance** than another dynamic parallel strategy.
- The proposed TSS approach achieves **near optimal performance** and is **comparable with a state-of-the-art** analytical TSS model.



Supplement: 11390_2019_1919_MOESM1_ESM.pdf [file 11390_2019_1919_MOESM1_ESM.pdf]
